# Supplementary material
Source: PubMed Central journal article supplement (PMC3931735)
Supplement: supp_140.15.3188_DEV090696.pdf [file supp_140.15.3188_DEV090696.pdf]

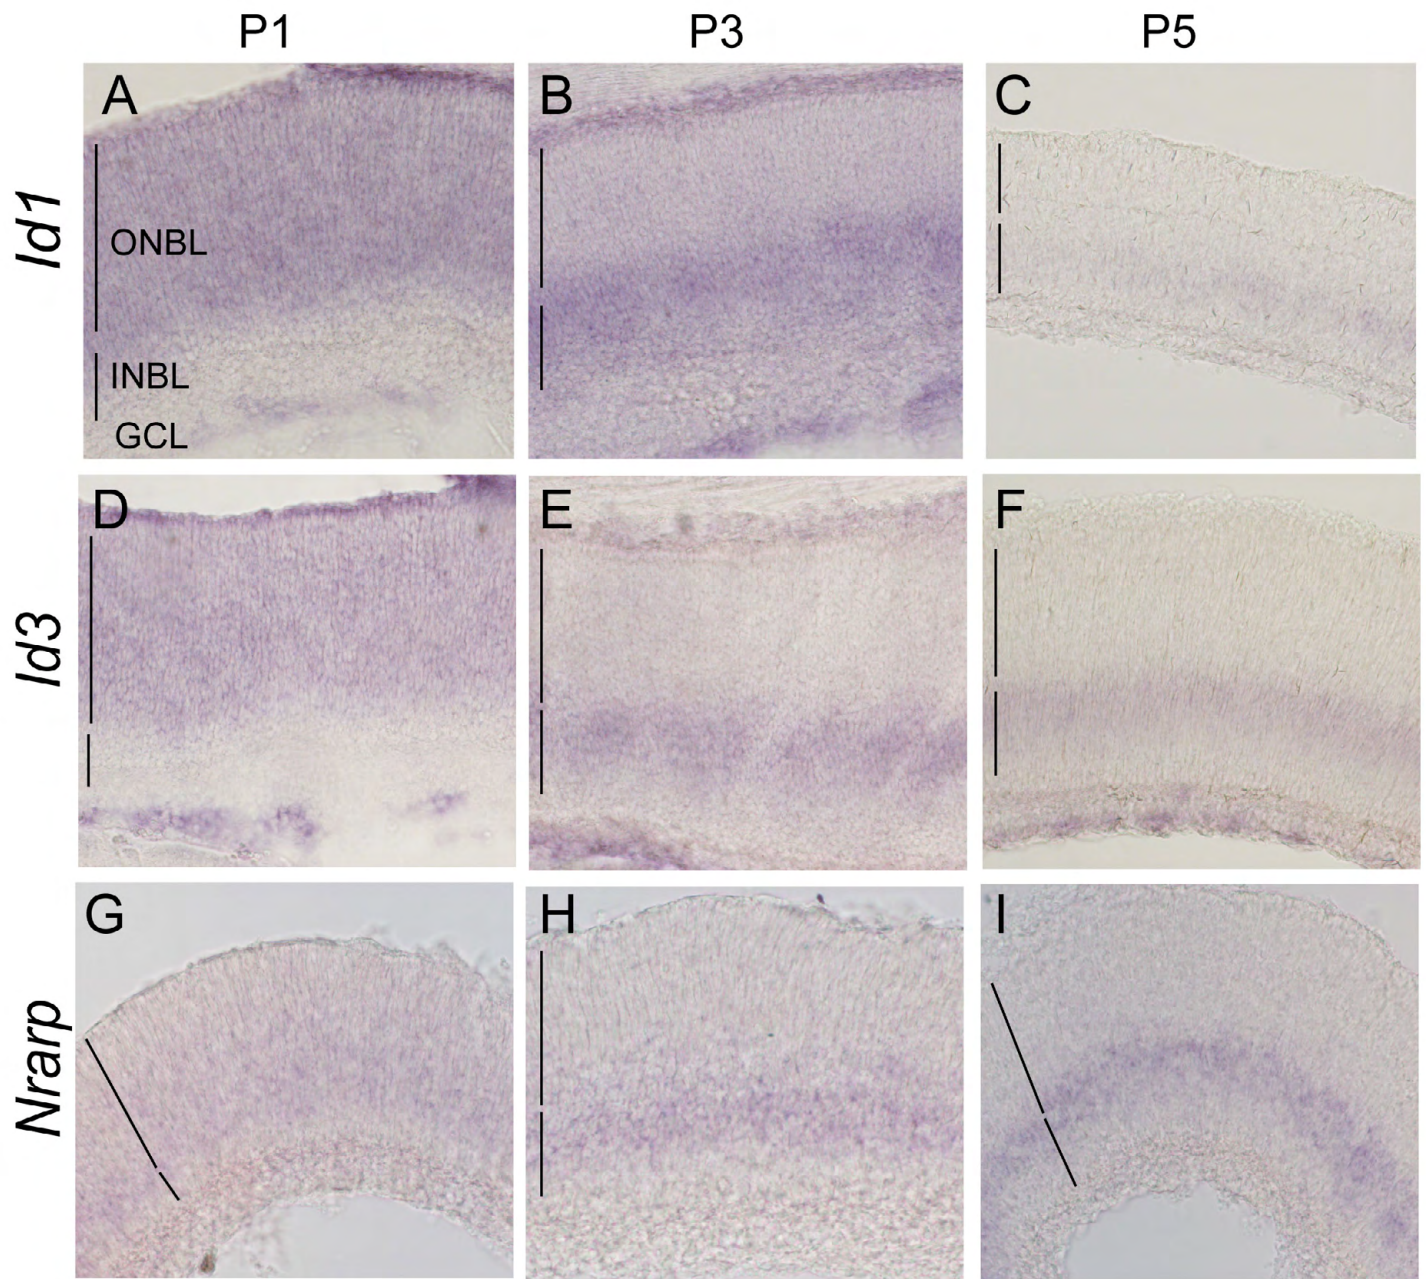

**Fig. S1. Expression of *Id1*, *Id3*, and *Nrarp* in the postnatal retina.** (A-I) Wild-type retinas were probed for *Id1*, *Id3* and *Nrarp* expression by *in situ* hybridization at P1 (A,D,G), P3 (B,E,H) and P5 (C,F,I) stages. Cellular laminae are denoted: ONBL, outer neuroblastic layer; INBL, inner neuroblastic layer; GCL, ganglion cell layer.

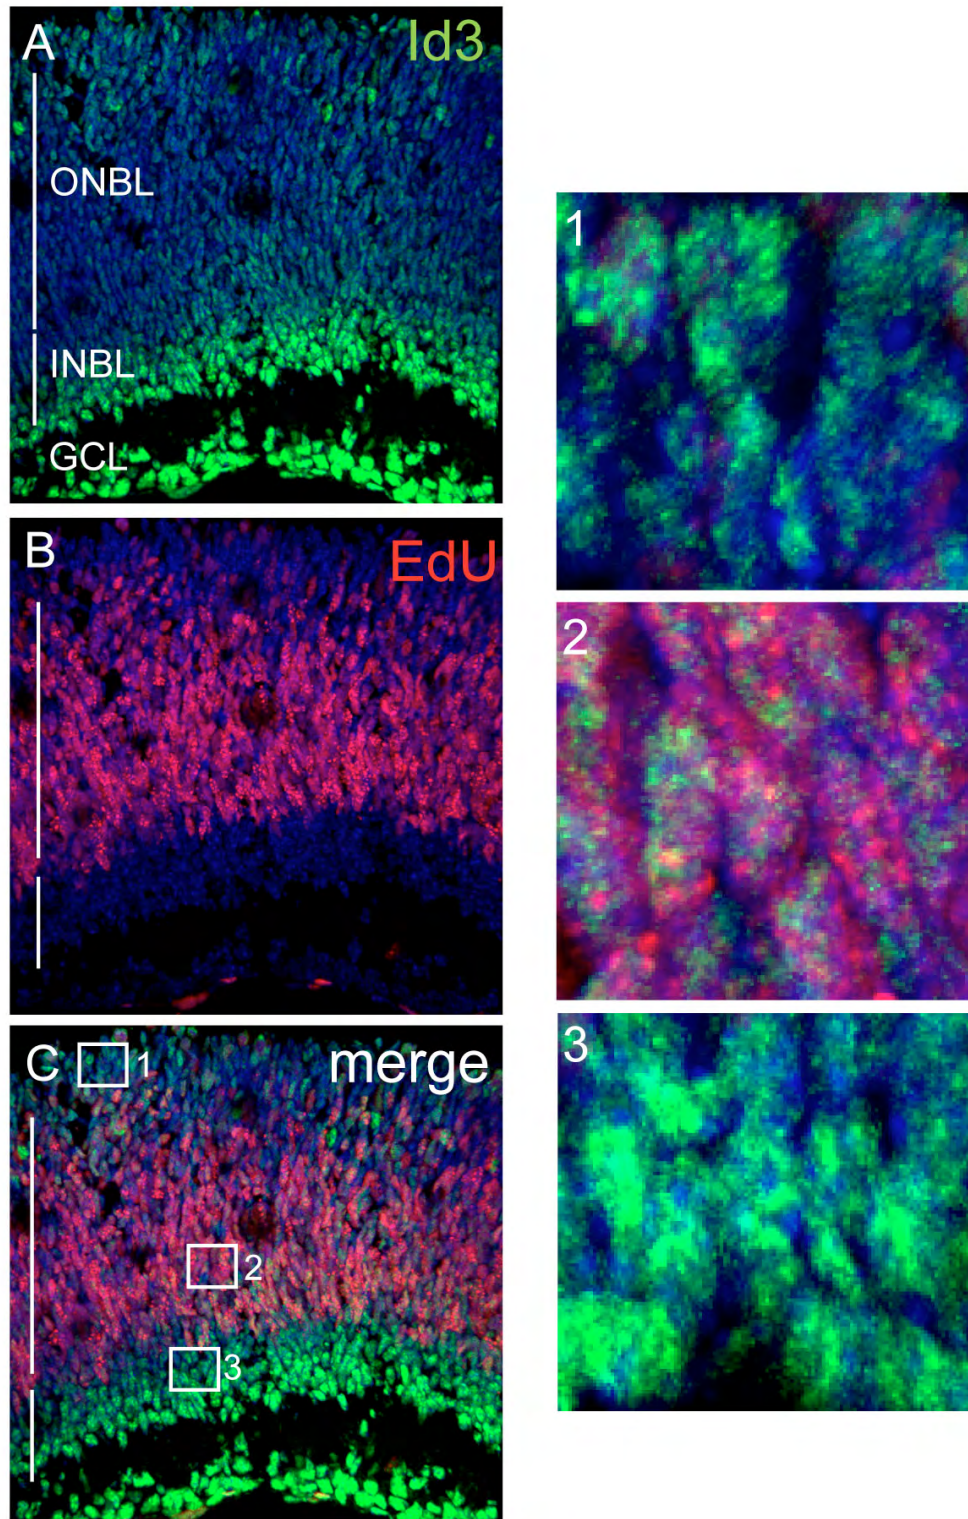

**Fig. S2. Expression of Id3 in mitotic and postmitotic retinal cells.** (A,B) P1 pups were injected three times with EdU over the course of 32 hours. The timing of injections was the same as described in Fig. 2, and retinas were harvested a few hours after the final injection. Retinas were stained with anti-Id3 (green) (A) and for EdU (magenta) (B). (C) Merged image. Insets show areas of the merged image at higher magnification. Cellular laminae are denoted: ONBL, outer neuroblastic layer; INBL, inner neuroblastic layer; GCL, ganglion cell layer. Id3<sup>+</sup> cells in the ONBL are both EdU<sup>-</sup> (1,3) and EdU<sup>+</sup> (2).
